# Supplementary material for: Synergistic enhancement of photovoltaic performance of TiO2 photoanodes by incorporation of Dawson-type polyoxometalate and gold nanoparticles
Source: Royal Society of Chemistry journal article supplement (doi:10.1039/c2jm35314h), 2012-01-01
Supplement: c2jm35314h.pdf [file c2jm35314h.pdf]

## Supporting Information

# Synergistic enhancement of photovoltaic performance for TiO<sub>2</sub> photoanode by incorporating with Dawson-type polyoxometalate and gold nanoparticles

*Lihao Wang,<sup>a</sup> Lin Xu,<sup>a,\*</sup> Zhongcheng Mu, Chungang Wang, Zhixia Sun*

### Materials

**Preparation of K<sub>6</sub>P<sub>2</sub>W<sub>18</sub>O<sub>62</sub>:** Na<sub>2</sub>WO<sub>4</sub> • 2H<sub>2</sub>O (100g) was added to 350ml of water, and the solution was heated to boiling. Then 150ml of 85% H<sub>3</sub>PO<sub>4</sub> was slowly added to the boiling solution, and the resulting yellow-green solution was refluxed for 5-13h. The solution was cooled, and the product was precipitated by addition of 100g of solid KCl. The light green precipitate was collected, redissolved in a minimum amount of hot water, and allowed to crystallize at 5 °C overnight. Cyclic voltammetry and UV-vis adsorption spectra were used to identify the product, which were shown in Fig. S1 and Fig. S2.

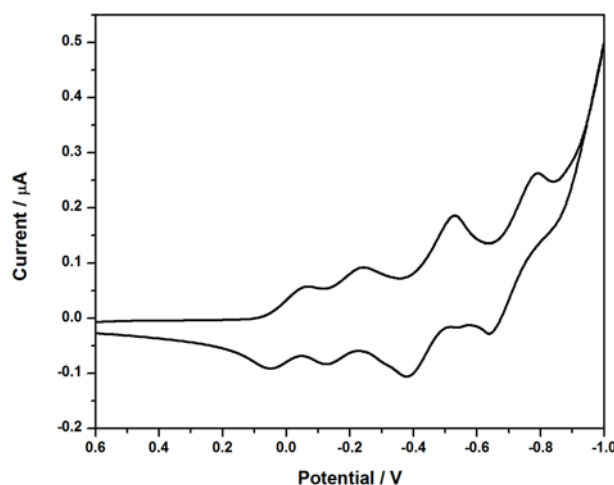

**Fig. S1** Cyclic voltammograms of P<sub>2</sub>W<sub>18</sub>.

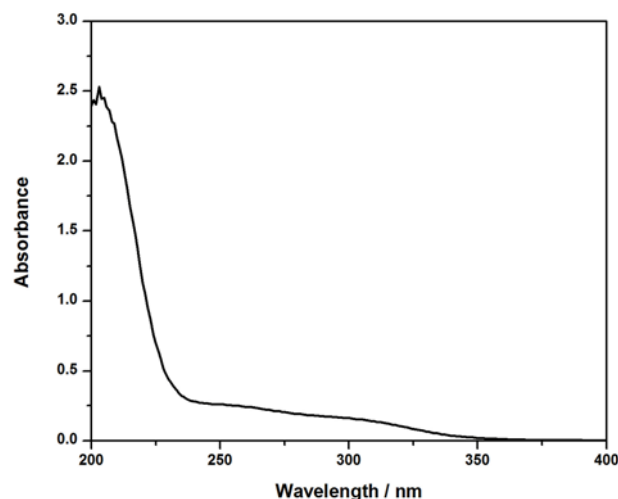

**Fig. S2** UV-vis absorption spectra of  $P_2W_{18}$ .

**Preparation of  $TiO_2$ :**  $TiO_2$  colloid solutions were prepared by hydrolysis of titanium isopropoxide,  $Ti(OCH(CH_3)_2)_4$ , as follows: 25ml  $Ti(OCH(CH_3)_2)_4$  was added to dropping funnel containing 0.4ml of 2-propanol. The mixture was added slowly to 15ml deionized water, stirring vigorously. During the hydrolysis, 0.1ml of 70%  $HNO_3$  was added. The mixture was then stirred for 8h at  $\sim 80^\circ C$ . As shown in Fig. S3 and Fig. S4, they were edscribed by X-ray diffraction (XRD) analysis and Transmission electron microscopy (TEM) image.

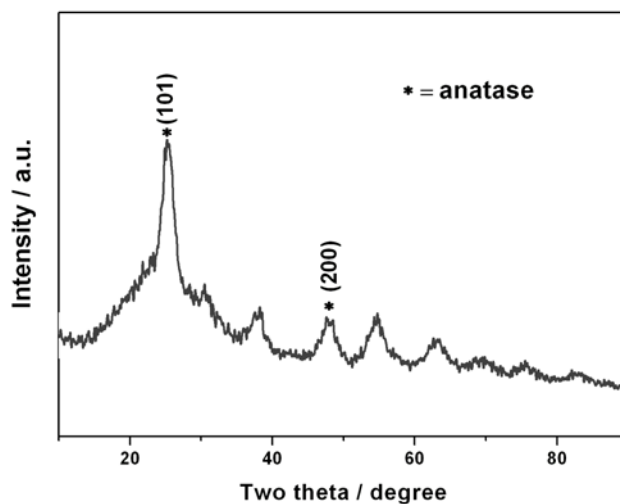

**Fig. S3.** XRD pattern of  $TiO_2$  colloids.

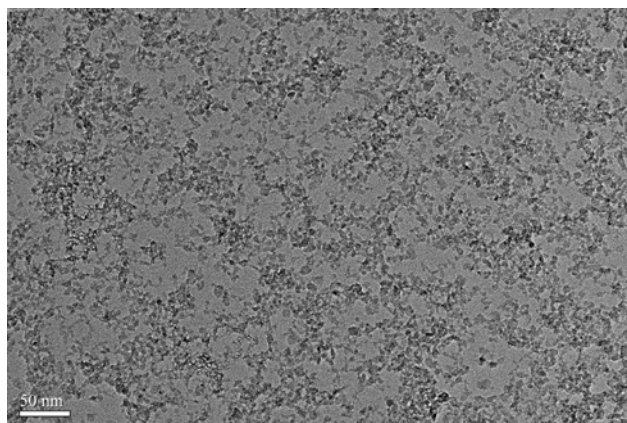

**Fig. S4.** TEM image of  $\text{TiO}_2$  colloids.

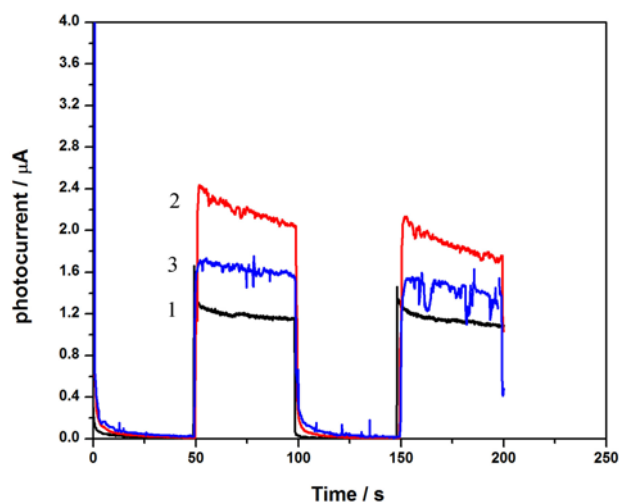

**Fig. S5** Photocurrent versus time curves of the  $(\text{P}_2\text{W}_{18}/\text{TiO}_2)_n$  films of different layers ( $n=1-3$ ).

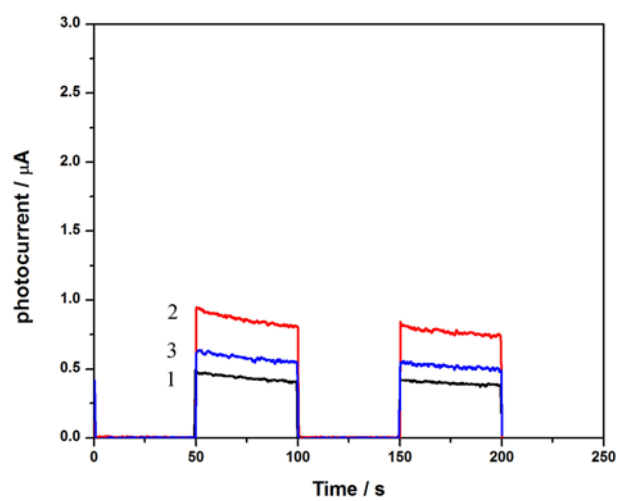

**Fig. S6** Photocurrent versus time curves of the  $(\text{PSS}/\text{TiO}_2)_n$  films of different layers ( $n=1-3$ ).

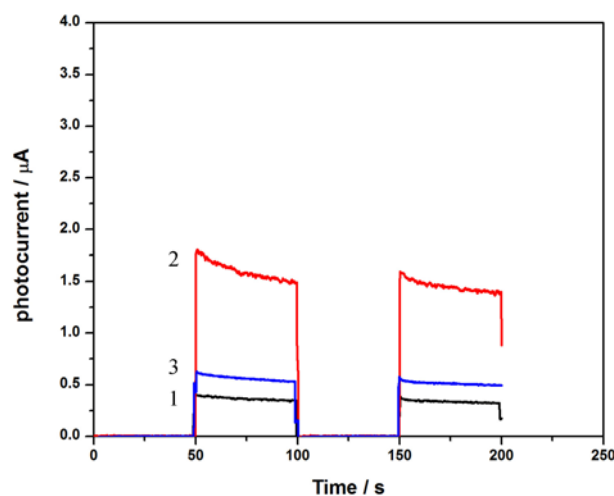

**Fig. S7** Photocurrent versus time curves of the  $(\text{PSS}/\text{TiO}_2/\text{PSS}/\text{Au})_n$  films of different layers ( $n=1-3$ ).

### Photoelectrochemical Oxidation of Methanol

To explore the photoelectrocatalytic activity of the LbL films, the photoelectrooxidation process of methanol was investigated at a constant bias of 0.5 V under Xe lamp irradiation. Fig. S8A shows the photocurrents obtained for the  $(\text{PSS}/\text{TiO}_2)_2$  film (a), the  $(\text{P}_2\text{W}_{18}/\text{TiO}_2)_2$  film (b), and the  $(\text{P}_2\text{W}_{18}/\text{TiO}_2/\text{P}_2\text{W}_{18}/\text{Au})_2$  film (c) in different concentrations of methanol. The presence of methanol increases the photocurrent responses of these films, and, in particular, the  $(\text{P}_2\text{W}_{18}/\text{TiO}_2/\text{P}_2\text{W}_{18}/\text{Au})_2$  film has the highest photocurrent in each concentration of methanol. This indicates that the  $(\text{P}_2\text{W}_{18}/\text{TiO}_2/\text{P}_2\text{W}_{18}/\text{Au})_2$  film possesses a more significant photoelectrooxidation activity for methanol. It is well known that the photogenerated hole can oxidate methanol either by formation of reactive hydroxyl radicals or by direct charge transfer. From comparison of the concentration dependence on the photocurrent (Fig. S8A) with model predictions (ref. *J. Phys. Chem. B*, 1999, **103**, 5505-5511.), we propose that the increase in the photocurrent measured in the presence of methanol can be attributed to direct hole transfer, which is similar to the results reported by Marugán and coworkers (ref. *Appl. Catal. B*, 2009, **89**, 273-283.). Furthermore, Fig. S8B displays the concentration / photocurrent ( $C/I_{\text{ph}}$ ) versus concentration plot for methanol oxidation at the  $(\text{PSS}/\text{TiO}_2)_2$  film (a), the  $(\text{P}_2\text{W}_{18}/\text{TiO}_2)_2$  film (b), and the  $(\text{P}_2\text{W}_{18}/\text{TiO}_2/\text{P}_2\text{W}_{18}/\text{Au})_2$  film. The kinetics plot of the photoelectrooxidation of methanol appears linearly in the 0.1-0.5 M range, which obeys the Langmuir-Hinselwood kinetics equation (ref. *Electrochim. Acta*, 2006, **51**, 2076-2087.).

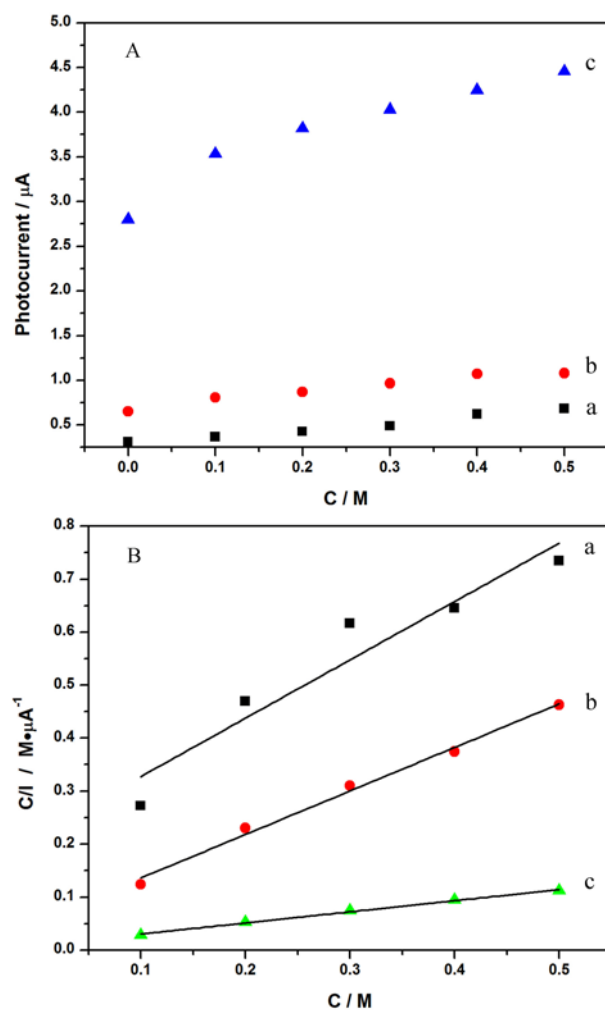

**Fig. S8** (A) Dependence of photocurrent on methanol concentration of (a) the  $(\text{PSS}/\text{TiO}_2)_2$  film, (b) the  $(\text{P}_2\text{W}_{18}/\text{TiO}_2)_2$  film, and (c) the  $(\text{P}_2\text{W}_{18}/\text{TiO}_2/\text{P}_2\text{W}_{18}/\text{Au})_2$  film in 0.1  $\text{Na}_2\text{SO}_4$ . (B) Plot of methanol concentration to photocurrent,  $C/I_{\text{ph}}$ , vs  $C$  for (a) the  $(\text{PSS}/\text{TiO}_2)_2$  film, (b) the  $(\text{P}_2\text{W}_{18}/\text{TiO}_2)_2$  film, and (c) the  $(\text{P}_2\text{W}_{18}/\text{TiO}_2/\text{P}_2\text{W}_{18}/\text{Au})_2$  film.

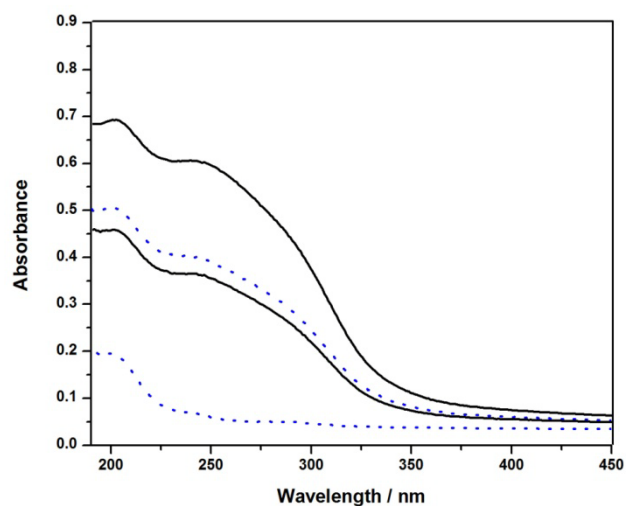

**Fig. S9** UV-vis absorption spectra of multilayer films  $(P_2W_{18}/TiO_2)_2$  (from lower to upper curves). The dashed line represents spectra after  $P_2W_{18}$  deposition, the solid line represents spectra after  $TiO_2$  deposition.

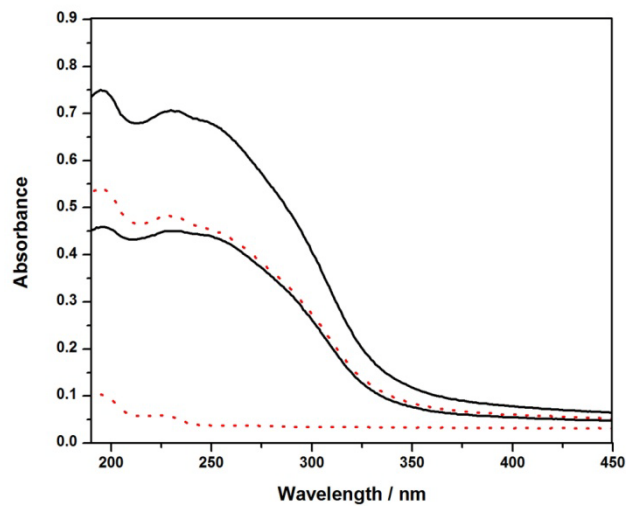

**Fig. S10** UV-vis absorption spectra of multilayer films  $(PSS/TiO_2)_2$  (from lower to upper curves). The dashed line represents spectra after PSS deposition, the solid line represents spectra after  $TiO_2$  deposition.

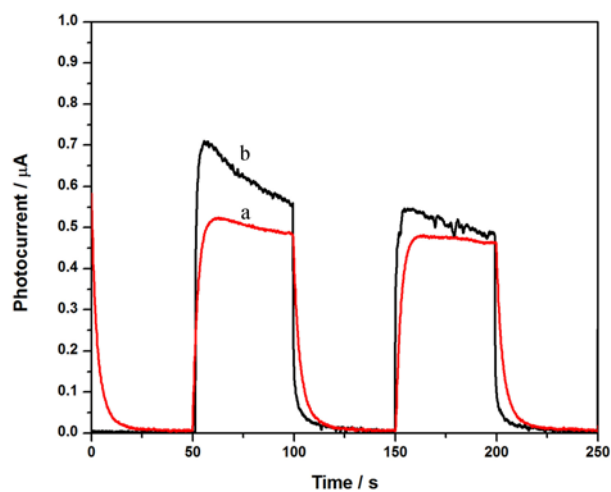

**Fig. S11** Photocurrent versus time curves of the  $(\text{P}_2\text{W}_{18}/\text{TiO}_2/\text{P}_2\text{W}_{18}/\text{Au})_2$  films in different electrolyte. (a) acetonitrile, (b) 0.1M  $\text{Na}_2\text{SO}_4$ .
